# Supplementary material for: Repetitive Negative Thinking and Eating Disorders: A Meta-Analysis of the Role of Worry and Rumination
Source: MDPI journal article supplement (doi:10.3390/jcm10112448), 2021-05-31
Supplement: s1 [file s1]

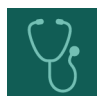

**Table S1.** Quality Assessment for Case-Control Studies using the Newcastle-Ottawa Scale.

| Study                                   | Study design<br>(independent<br>validation of<br>cases) | Selection                                        |                                                     |                                                         | Comparability                              |                                             | Exposure                            |                                      |                                                           | Total<br>score (10) |                                                 |
|-----------------------------------------|---------------------------------------------------------|--------------------------------------------------|-----------------------------------------------------|---------------------------------------------------------|--------------------------------------------|---------------------------------------------|-------------------------------------|--------------------------------------|-----------------------------------------------------------|---------------------|-------------------------------------------------|
|                                         |                                                         | Representativeness<br>of the sample <sup>a</sup> | Selection of<br>controls<br>(community<br>controls) | Definition of<br>controls<br>(no history of<br>disease) | Comparability<br><u>cases-controls</u>     |                                             | Ascertainment of<br><u>exposure</u> |                                      | Same method of<br>ascertainment for<br>cases and controls |                     | Response rate<br>same for cases<br>and controls |
|                                         |                                                         |                                                  |                                                     |                                                         | Matched<br>by first<br>factor <sup>b</sup> | Matched by<br>second<br>factor <sup>c</sup> | Secure<br>record                    | Structured<br>interview <sup>d</sup> |                                                           |                     |                                                 |
| Napolitano, &<br>Himes, 2011<br>[31]    |                                                         |                                                  | +                                                   | +                                                       |                                            |                                             |                                     | +                                    | +                                                         | +                   | 5/10                                            |
| Sassaroli et<br>al., 2005 [32]          |                                                         | +                                                | +                                                   |                                                         | +                                          | +                                           |                                     |                                      |                                                           | +                   | 5/10                                            |
| Sternheim et<br>al., 2012 [33]          |                                                         | +                                                | +                                                   | +                                                       | +                                          | +                                           |                                     |                                      | +                                                         | +                   | 7/10                                            |
| Kollei et al.,<br>2012 [58]             |                                                         | +                                                | +                                                   | +                                                       | +                                          | +                                           |                                     |                                      | +                                                         | +                   | 7/10                                            |
| Naumann et<br>al., 2015 [59]            |                                                         | +                                                | +                                                   | +                                                       | +                                          | +                                           |                                     |                                      | +                                                         | +                   | 7/10                                            |
| Sapuppo et<br>al., 2018 [60]            |                                                         |                                                  | +                                                   | +                                                       | +                                          | +                                           |                                     |                                      | +                                                         | +                   | 6/10                                            |
| Troop &<br>Treasure,<br>1997 [61]       |                                                         |                                                  | +                                                   | +                                                       | +                                          | +                                           |                                     |                                      | +                                                         |                     | 5/10                                            |
| Rawal et al.,<br>2010 (study 2)<br>[63] |                                                         | +                                                | +                                                   | +                                                       | +                                          | +                                           |                                     |                                      | +                                                         | +                   | 7/10                                            |
| Crino et al.,<br>2019 [68]              |                                                         | +                                                | +                                                   | +                                                       | +                                          | +                                           |                                     |                                      | +                                                         | +                   | 7/10                                            |
| Naumann et<br>al., 2016 [85]            | +                                                       | +                                                | +                                                   | +                                                       |                                            |                                             |                                     |                                      | +                                                         | +                   | 6/10                                            |
| Seidel et al.,<br>2016 [86]             |                                                         | +                                                | +                                                   | +                                                       | +                                          | +                                           |                                     |                                      | +                                                         |                     | 6/10                                            |
| Hernando et<br>al., 2019 [94]           |                                                         | +                                                | +                                                   | +                                                       | +                                          | +                                           |                                     |                                      | +                                                         | +                   | 7/10                                            |

Note: + = indicates that the investigated characteristic is present in the study; a = Criteria: (1) during defined period; (2) during defined area; (3) all cases in a defined group; (4) appropriate sample (random or consecutive); b = age; c = sex; d = blinding case-control status.

**Table S2.** Quality Assessment for Cross Sectional Studies using the Newcastle-Ottawa Scale.

| Study                                | Representa-<br>tiveness of the<br>sample | Sample<br>size | Selection                                                    | Ascertainment of the<br>exposure |                                              | Based on the<br>study design<br>and analysis | Outcome                            |                   |                | Statistical<br>test | Total<br>score<br>(10) |
|--------------------------------------|------------------------------------------|----------------|--------------------------------------------------------------|----------------------------------|----------------------------------------------|----------------------------------------------|------------------------------------|-------------------|----------------|---------------------|------------------------|
|                                      |                                          |                | Non-<br>respondents<br>(satisfactory<br>response rate<br>is) | Validated<br>measurement<br>tool | Non-validated<br>tool but it is<br>described |                                              | Assessment of the outcome          |                   |                |                     |                        |
|                                      |                                          |                |                                                              |                                  |                                              |                                              | Independent<br>blind<br>assessment | Record<br>linkage | Self<br>report |                     |                        |
| González et al.,<br>2017 [57]        | +                                        | +              | +                                                            | ++                               |                                              |                                              |                                    |                   | +              | +                   | 7/10                   |
| Cowdrey & Park,<br>2012 [62]         | +                                        | +              | +                                                            | ++                               |                                              |                                              |                                    |                   | +              | +                   | 7/10                   |
| Rawal et al., 2010<br>Study 1 [63]   | +                                        | +              | +                                                            | ++                               |                                              |                                              |                                    |                   | +              | +                   | 7/10                   |
| Wang & Borders,<br>2018 study 1 [64] | +                                        | +              | +                                                            | ++                               |                                              |                                              |                                    |                   | +              | +                   | 7/10                   |
| Wang & Borders,<br>2018 study 2 [64] | +                                        | +              | +                                                            | ++                               |                                              |                                              |                                    |                   | +              | +                   | 7/10                   |
| Mason & Lewis,<br>2017 [65]          | +                                        | +              | +                                                            | ++                               |                                              |                                              |                                    |                   | +              | +                   | 7/10                   |
| Startup et al.,<br>2013 [66]         | +                                        | +              |                                                              | ++                               |                                              |                                              |                                    |                   | +              | +                   | 6/10                   |
| Zarychta et al.,<br>2017 [67]        | +                                        | +              | +                                                            | ++                               |                                              |                                              |                                    |                   | +              | +                   | 7/10                   |
| Hartmann et al.,<br>2019 [69]        | +                                        | +              | +                                                            |                                  | +                                            |                                              |                                    |                   | +              | +                   | 6/10                   |
| Connolly et al.,<br>2007 [70]        | +                                        | +              | +                                                            | ++                               |                                              |                                              |                                    |                   | +              | +                   | 7/10                   |
| Nolen-Hoeksema<br>et al., 2007 [71]  | +                                        | +              | +                                                            | ++                               |                                              |                                              |                                    |                   | +              | +                   | 7/10                   |
| Harrell et al.,<br>2008 [72]         | +                                        | +              | +                                                            | ++                               |                                              |                                              |                                    |                   | +              | +                   | 7/10                   |
| Selby et al., 2008<br>[73]           | +                                        | +              | +                                                            | ++                               |                                              | +                                            |                                    |                   | +              | +                   | 8/10                   |

|                                   |   |   |   |    |   |   |   |      |
|-----------------------------------|---|---|---|----|---|---|---|------|
| Aldao & Nolen-Hoeksema, 2010 [74] | + | + | + | ++ |   | + | + | 7/10 |
| Holm-Denoma & Hankin, 2010 [75]   | + | + | + | ++ |   | + | + | 7/10 |
| Verplanken & Tangelder, 2011 [76] | + | + | + | ++ |   | + | + | 7/10 |
| Gordon et al., 2012 [77]          | + | + | + | ++ | + | + | + | 8/10 |
| Kelly et al., 2012 [78]           | + | + | + | ++ |   | + | + | 7/10 |
| Hilt et al., 2013 [79]            | + | + | + | ++ |   | + | + | 7/10 |
| Svaldi & Naumann, 2014 [80]       | + | + | + | ++ |   | + | + | 7/10 |
| Mason & Lewis, 2015 [81]          | + | + | + | ++ |   | + | + | 7/10 |
| Breithaupt et al., 2016 [82]      | + | + | + | ++ |   | + | + | 7/10 |
| Jungmann et al., 2016 [83]        | + | + | + | ++ |   | + | + | 7/10 |
| Maraldo et al., 2016 [84]         | + | + | + | ++ |   | + | + | 7/10 |
| Opwis et al., 2017 [87]           | + | + | + | ++ |   | + | + | 7/10 |
| Wang & Borders, 2017 [88]         |   | + | + |    | + | + | + | 5/10 |
| Wang et al., 2017 [89]            | + | + | + | ++ |   | + | + | 7/10 |
| Dondzillo et al., 2018 [90]       | + | + | + | ++ | + | + | + | 8/10 |
| Van Durme et al., 2018 [91]       | + | + | + | ++ |   | + | + | 7/10 |

|                                     |   |   |   |    |  |   |   |      |
|-------------------------------------|---|---|---|----|--|---|---|------|
| Birmachu et al.,<br>2019 [92]       | + | + | + | ++ |  | + | + | 7/10 |
| Fresnics et al.,<br>2019 [93]       | + | + | + | ++ |  | + | + | 7/10 |
| Smith et al., 2019<br>[95]          | + | + | + | ++ |  | + | + | 7/10 |
| Branley-Bell &<br>Talbot, 2020 [96] | + | + | + | +  |  | + | + | 6/10 |

Note: + = indicates that the investigated characteristic is present in the study. In the section “Selection: Ascertainment of the exposure” two + must be assigned if the study use validated measurement tool, while one + must be assigned in case of non-validated measurement tool, but the tool is available or described
